# Supplementary material for: Characterization of Groundwater Recharge and Flow in California's San Joaquin Valley From InSAR‐Observed Surface Deformation
Source: PubMed Central journal article supplement — Water Resour Res. 2021 Apr 7;57(4):e2020WR028451. doi: 10.1029/2020WR028451 (PMC8047915; doi:10.1029/2020wr028451), 2021-04-07
Supplement: WRCR-57-e2020WR028451-s003.pdf [file WRCR-57-e2020WR028451-s003.pdf]

| Time Period                             | Velocity residual median (mm/yr) | Velocity residual $\sigma_r$ (mm/yr) | Time series residual $\sigma_r$ (mm) |
|-----------------------------------------|----------------------------------|--------------------------------------|--------------------------------------|
| April 2015 to October 2017              | -0.3                             | 2.9                                  | 4.3                                  |
| WY2016 (October 2015 to September 2016) | -0.8                             | 6.4                                  | 3.2                                  |
| WY2017 (October 2016 to September 2017) | -3.7                             | 11.1                                 | 4.0                                  |
