# Supplementary material for: Characterization of Groundwater Recharge and Flow in California's San Joaquin Valley From InSAR‐Observed Surface Deformation
Source: PubMed Central journal article supplement — Water Resour Res. 2021 Apr 7;57(4):e2020WR028451. doi: 10.1029/2020WR028451 (PMC8047915; doi:10.1029/2020wr028451), 2021-04-07
Supplement: WRCR-57-e2020WR028451-s007.pdf [file WRCR-57-e2020WR028451-s007.pdf]

| Time Period                                | Acquisitions | Mean connections per acquisition | Median connections per acquisition | Number of pairs | Mean perpendicular baseline (m) | Standard deviation perpendicular baseline (m) |
|--------------------------------------------|--------------|----------------------------------|------------------------------------|-----------------|---------------------------------|-----------------------------------------------|
| April 2015 to October 2017                 | 51           | 10.6                             | 10                                 | 263             | -23.2                           | 49.4                                          |
| WY2016<br>(October 2015 to September 2016) | 15           | 7.3                              | 7                                  | 53              | -13.9                           | 43.6                                          |
| WY2017<br>(October 2016 to September 2017) | 28           | 13.4                             | 14                                 | 188             | -24.2                           | 50.7                                          |
