# Supplementary material for: Characterization of Groundwater Recharge and Flow in California's San Joaquin Valley From InSAR‐Observed Surface Deformation
Source: PubMed Central journal article supplement — Water Resour Res. 2021 Apr 7;57(4):e2020WR028451. doi: 10.1029/2020WR028451 (PMC8047915; doi:10.1029/2020wr028451), 2021-04-07
Supplement: WRCR-57-e2020WR028451-s008.pdf [file WRCR-57-e2020WR028451-s008.pdf]

| Mission      | Day | Month | Year | B (m)  | Mission     | Day | Month | Year | B (m)  |
|--------------|-----|-------|------|--------|-------------|-----|-------|------|--------|
| Sentinel-1A  | 1   | 4     | 2015 | -52.7  | Sentinel-1A | 8   | 1     | 2017 | -32.4  |
| Sentinel-1A  | 25  | 4     | 2015 | -115.9 | Sentinel-1B | 14  | 1     | 2017 | 69.3   |
| Sentinel-1A  | 19  | 5     | 2015 | -14.9  | Sentinel-1A | 20  | 1     | 2017 | -95.8  |
| Sentinel-1A  | 12  | 6     | 2015 | 30.4   | Sentinel-1B | 26  | 1     | 2017 | 28.8   |
| Sentinel-1A  | 6   | 7     | 2015 | -91.3  | Sentinel-1A | 1   | 2     | 2017 | -63.3  |
| Sentinel-1A  | 30  | 7     | 2015 | 34.8   | Sentinel-1A | 25  | 2     | 2017 | 24.8   |
| Sentinel-1A  | 23  | 8     | 2015 | -0.1   | Sentinel-1A | 9   | 3     | 2017 | -40.7  |
| Sentinel-1A  | 16  | 9     | 2015 | -87.2  | Sentinel-1A | 21  | 3     | 2017 | -117.3 |
| Sentinel-1A  | 10  | 10    | 2015 | -20.1  | Sentinel-1A | 2   | 4     | 2017 | -78.2  |
| Sentinel-1A  | 3   | 11    | 2015 | -19.1  | Sentinel-1A | 14  | 4     | 2017 | -17.8  |
| Sentinel-1A  | 27  | 11    | 2015 | 54.1   | Sentinel-1A | 26  | 4     | 2017 | -20.1  |
| Sentinel-1A  | 21  | 12    | 2015 | -20.2  | Sentinel-1A | 8   | 5     | 2017 | 49.3   |
| Sentinel-1A  | 14  | 1     | 2016 | -52.7  | Sentinel-1A | 20  | 5     | 2017 | -27.7  |
| Sentinel-1A  | 7   | 2     | 2016 | 73.9   | Sentinel-1A | 1   | 6     | 2017 | -116.2 |
| Sentinel-1A  | 2   | 3     | 2016 | -57.9  | Sentinel-1A | 13  | 6     | 2017 | -45.1  |
| Sentinel-1A  | 26  | 3     | 2016 | 11.5   | Sentinel-1A | 25  | 6     | 2017 | 16.0   |
| Sentinel-1A  | 19  | 4     | 2016 | -3.5   | Sentinel-1A | 7   | 7     | 2017 | -40.4  |
| Sentinel-1A  | 13  | 5     | 2016 | -68.2  | Sentinel-1A | 19  | 7     | 2017 | -102.6 |
| Sentinel-1A  | 6   | 6     | 2016 | 7.7    | Sentinel-1A | 31  | 7     | 2017 | -26.9  |
| Sentinel-1A  | 24  | 7     | 2016 | -58.9  | Sentinel-1A | 12  | 8     | 2017 | -41.2  |
| Sentinel-1A* | 17  | 8     | 2016 | 0.0    | Sentinel-1A | 24  | 8     | 2017 | -2.1   |
| Sentinel-1A  | 10  | 9     | 2016 | -71.9  | Sentinel-1A | 5   | 9     | 2017 | -20.7  |
| Sentinel-1A  | 4   | 10    | 2016 | 17.5   | Sentinel-1A | 17  | 9     | 2017 | 13.1   |
| Sentinel-1A  | 28  | 10    | 2016 | 30.9   | Sentinel-1A | 29  | 9     | 2017 | -47.8  |
| Sentinel-1A  | 15  | 12    | 2016 | 55.5   | Sentinel-1A | 11  | 10    | 2017 | -46.3  |
| ...          | ... | ...   | ...  | ...    | Sentinel-1A | 23  | 10    | 2017 | 14.3   |

\* Primary reference image used to align other acquisitions.
