# Supplementary material for: Characterization of Groundwater Recharge and Flow in California's San Joaquin Valley From InSAR‐Observed Surface Deformation
Source: PubMed Central journal article supplement — Water Resour Res. 2021 Apr 7;57(4):e2020WR028451. doi: 10.1029/2020WR028451 (PMC8047915; doi:10.1029/2020wr028451), 2021-04-07
Supplement: WRCR-57-e2020WR028451-s010.pdf [file WRCR-57-e2020WR028451-s010.pdf]

| Station | Latitude | Longitude | Station | Latitude | Longitude | Station | Latitude | Longitude |
|---------|----------|-----------|---------|----------|-----------|---------|----------|-----------|
| ARM1    | 35.2013  | -118.9104 | P305    | 37.3522  | -120.1968 | P562    | 34.9821  | -118.1887 |
| BBDM    | 34.5822  | -119.9815 | P306    | 37.7952  | -120.6445 | P563    | 35.4187  | -119.4212 |
| BCWR    | 34.9205  | -119.4058 | P307    | 36.9473  | -120.0579 | P564    | 35.6229  | -119.3494 |
| BEPK    | 35.8784  | -118.0741 | P311    | 37.1776  | -118.5198 | P565    | 35.7439  | -119.2367 |
| BVPP    | 35.1573  | -119.3475 | P465    | 36.4668  | -118.1324 | P566    | 36.3245  | -119.2293 |
| CHMS    | 34.6405  | -117.8277 | P466    | 36.5312  | -117.7895 | P567    | 35.4209  | -118.7536 |
| CTDM    | 34.5165  | -118.6132 | P468    | 36.9757  | -118.1184 | P569    | 35.3780  | -118.1238 |
| CUHS    | 34.9426  | -119.6739 | P469    | 37.2314  | -117.9358 | P570    | 35.6673  | -118.2600 |
| EDPP    | 34.9462  | -118.8304 | P512    | 37.5626  | -119.6944 | P571    | 36.2314  | -118.7667 |
| ELTN    | 34.7031  | -118.4257 | P513    | 34.9073  | -120.6502 | P572    | 36.5855  | -118.9546 |
| FGST    | 34.7330  | -120.0094 | P514    | 35.0107  | -120.4097 | P573    | 36.0931  | -118.2605 |
| GR8R    | 36.3990  | -120.4157 | P518    | 35.0200  | -120.0753 | P616    | 35.4246  | -117.8933 |
| HIVI    | 34.7599  | -117.7995 | P520    | 34.6305  | -119.6164 | P630    | 37.6130  | -119.0004 |
| ISLK    | 35.6623  | -118.4743 | P521    | 34.8886  | -119.8154 | P632    | 37.7857  | -119.0861 |
| LAND    | 35.8998  | -120.4733 | P523    | 35.3044  | -120.8603 | P639    | 37.6546  | -118.8687 |
| LVMS    | 34.7336  | -119.1037 | P525    | 35.4258  | -120.8081 | P647    | 37.7544  | -118.7677 |
| MUSB    | 37.1699  | -119.3094 | P526    | 35.6360  | -120.8697 | P652    | 37.5892  | -118.2385 |
| ORES    | 34.7391  | -120.2786 | P528    | 35.3278  | -120.5454 | P653    | 37.7375  | -118.4717 |
| OZST    | 34.6834  | -119.3534 | P529    | 35.4405  | -120.3538 | P724    | 37.4395  | -118.5611 |
| P056    | 36.0274  | -119.0629 | P530    | 35.6248  | -120.4804 | P725    | 37.0889  | -119.7456 |
| P093    | 36.6060  | -117.9941 | P532    | 35.6338  | -120.2670 | P726    | 37.2805  | -118.1467 |
| P245    | 37.7131  | -119.7061 | P536    | 35.2798  | -120.0250 | P727    | 37.2736  | -118.4668 |
| P290    | 36.1789  | -120.7283 | P537    | 35.3168  | -119.9353 | P812    | 35.1525  | -118.0165 |
| P291    | 35.9228  | -120.6448 | P538    | 35.5342  | -120.1125 | RBRU    | 36.7591  | -119.8287 |
| P294    | 36.1232  | -120.4399 | P544    | 35.7313  | -119.7380 | RSTP    | 34.8751  | -118.1929 |
| P301    | 36.8063  | -120.7431 | P546    | 35.9279  | -120.1549 | RSVY    | 34.5415  | -119.1844 |
| P302    | 36.6347  | -120.6186 | P547    | 35.9347  | -119.9094 | THCP    | 35.1582  | -118.4146 |
| P303    | 37.0544  | -120.7053 | P549    | 34.5996  | -119.3263 | VNDP    | 34.5563  | -120.6165 |
| P304    | 36.7390  | -120.3566 | P553    | 34.8351  | -118.8790 | VNPS    | 34.5015  | -118.1212 |
| ...     | ...      | ...       | ...     | ...      | ...       | WGPP    | 35.0108  | -118.9837 |
