# Supplementary figures and images for: Characterization of Groundwater Recharge and Flow in California's San Joaquin Valley From InSAR‐Observed Surface Deformation
Source: PubMed Central journal article supplement — Water Resour Res. 2021 Apr 7;57(4):e2020WR028451. doi: 10.1029/2020WR028451 (PMC8047915; doi:10.1029/2020wr028451), 2021-04-07

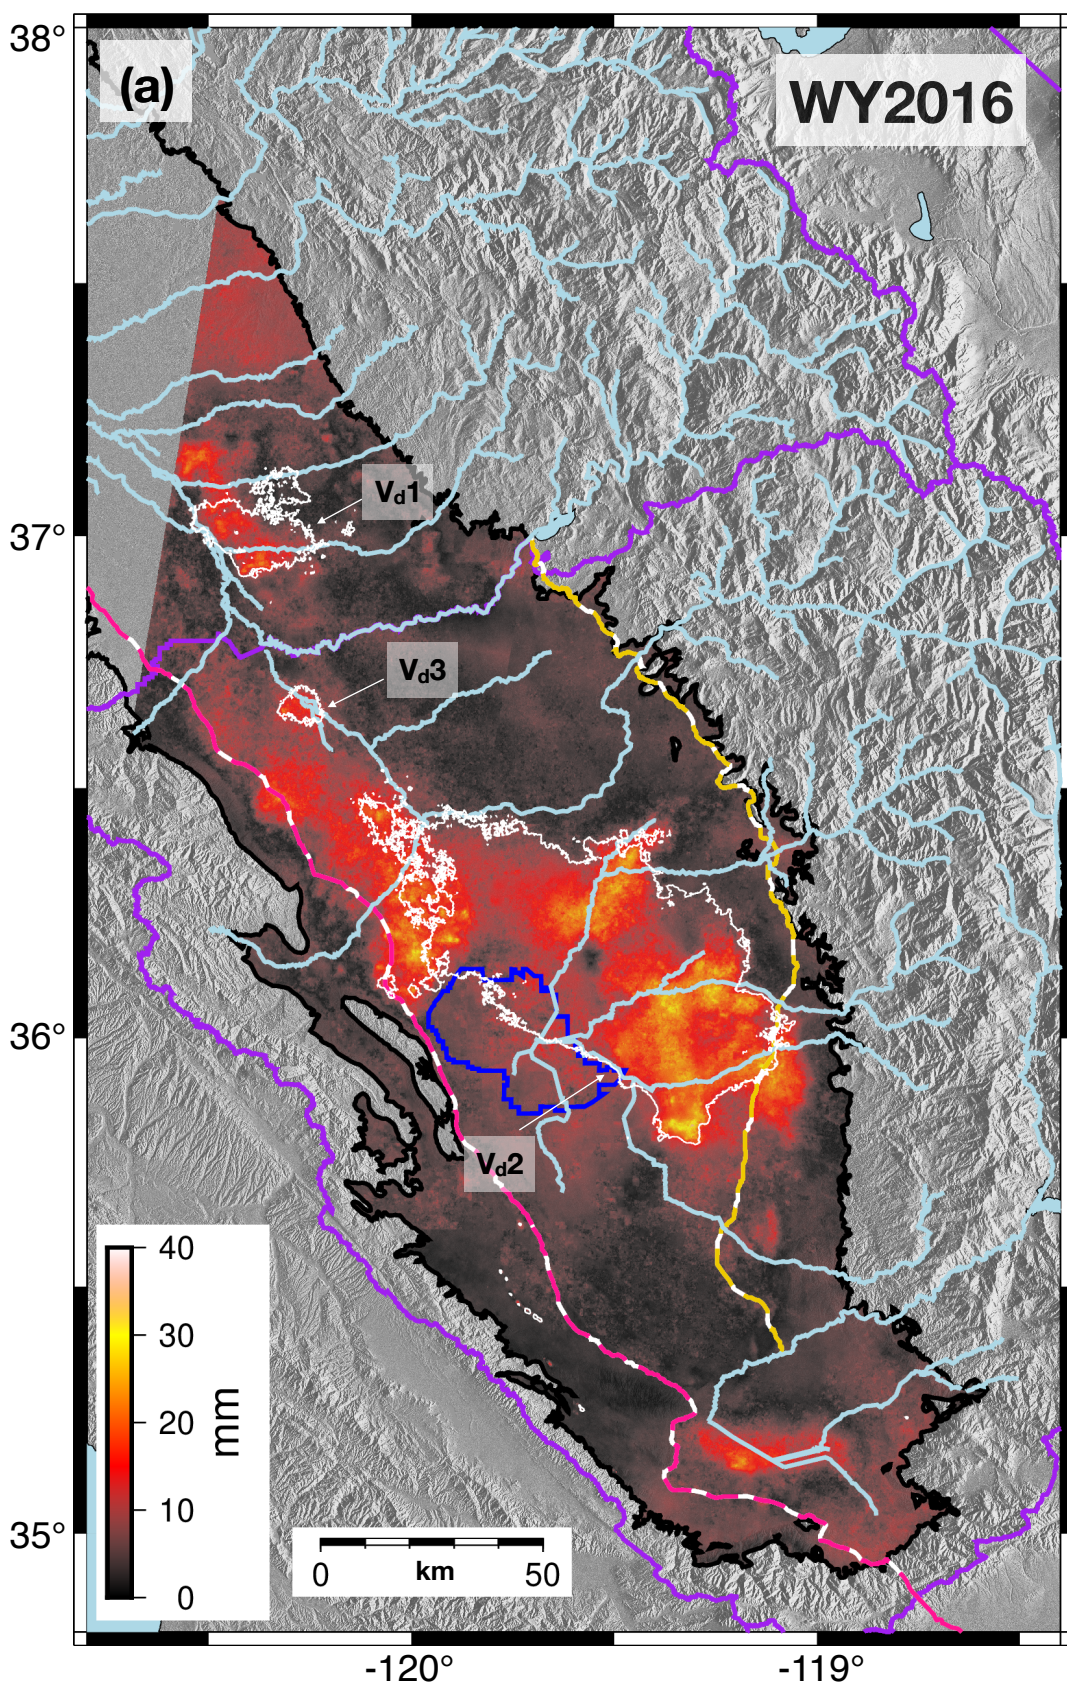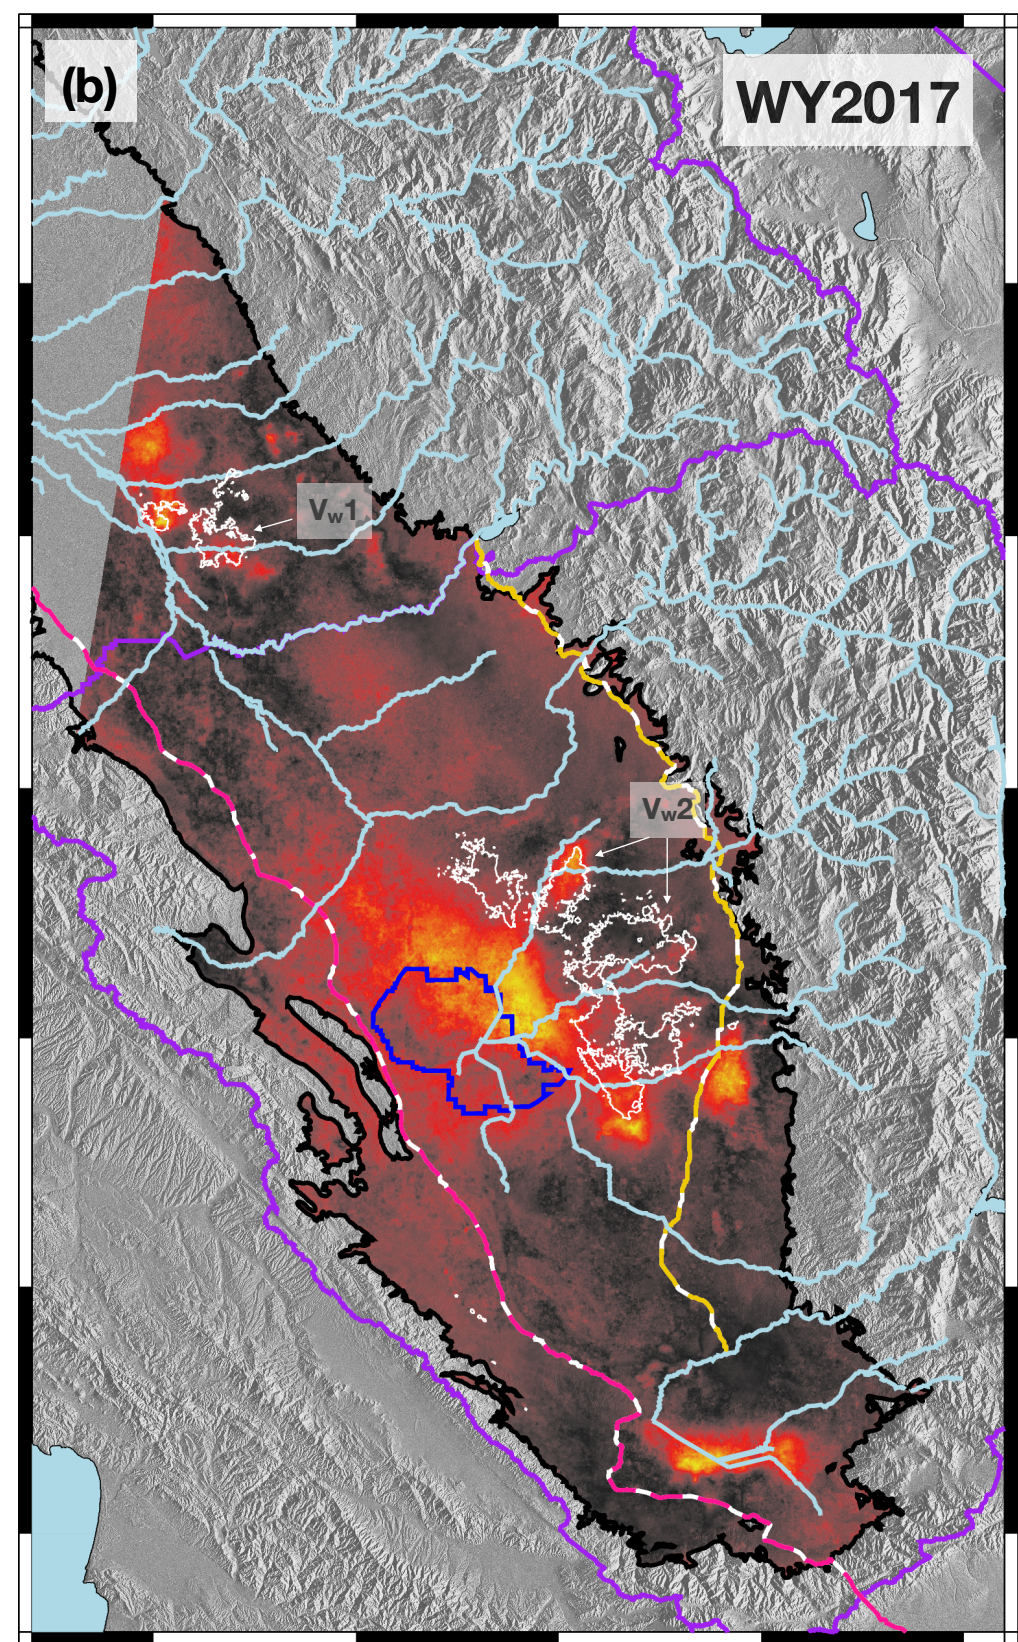

Supplement: WRCR-57-e2020WR028451-s001.pdf [file WRCR-57-e2020WR028451-s001.pdf]

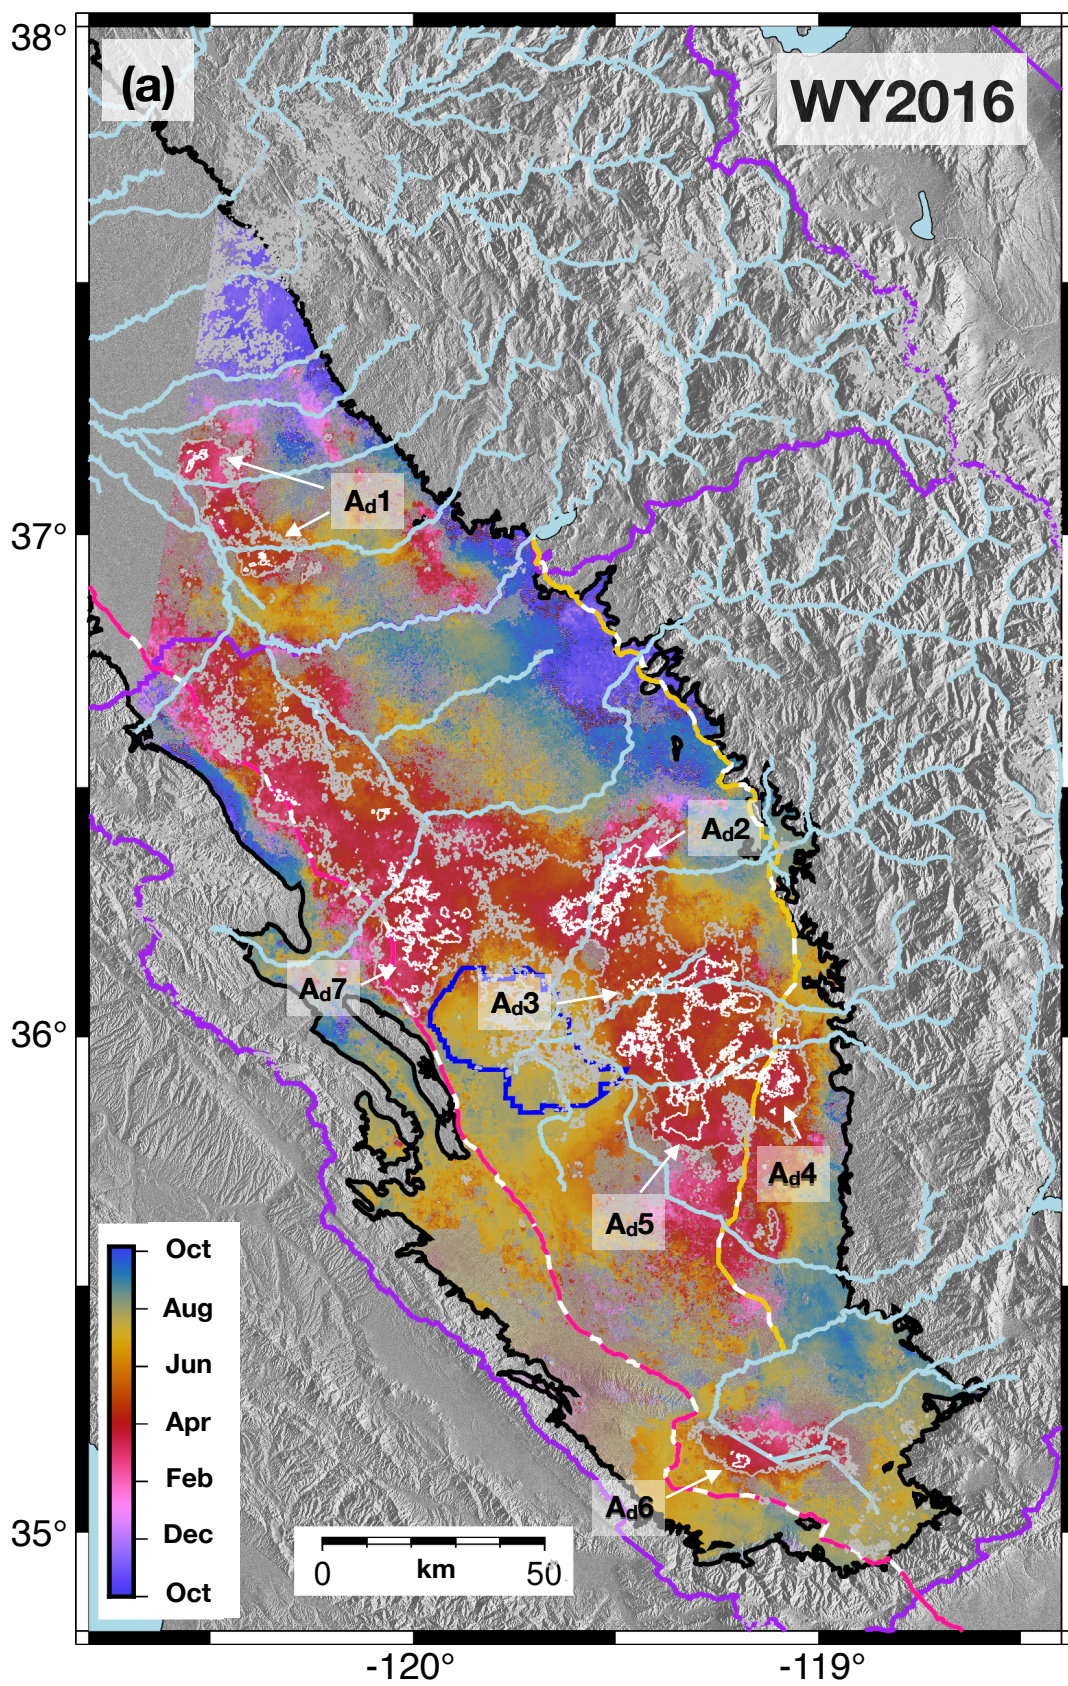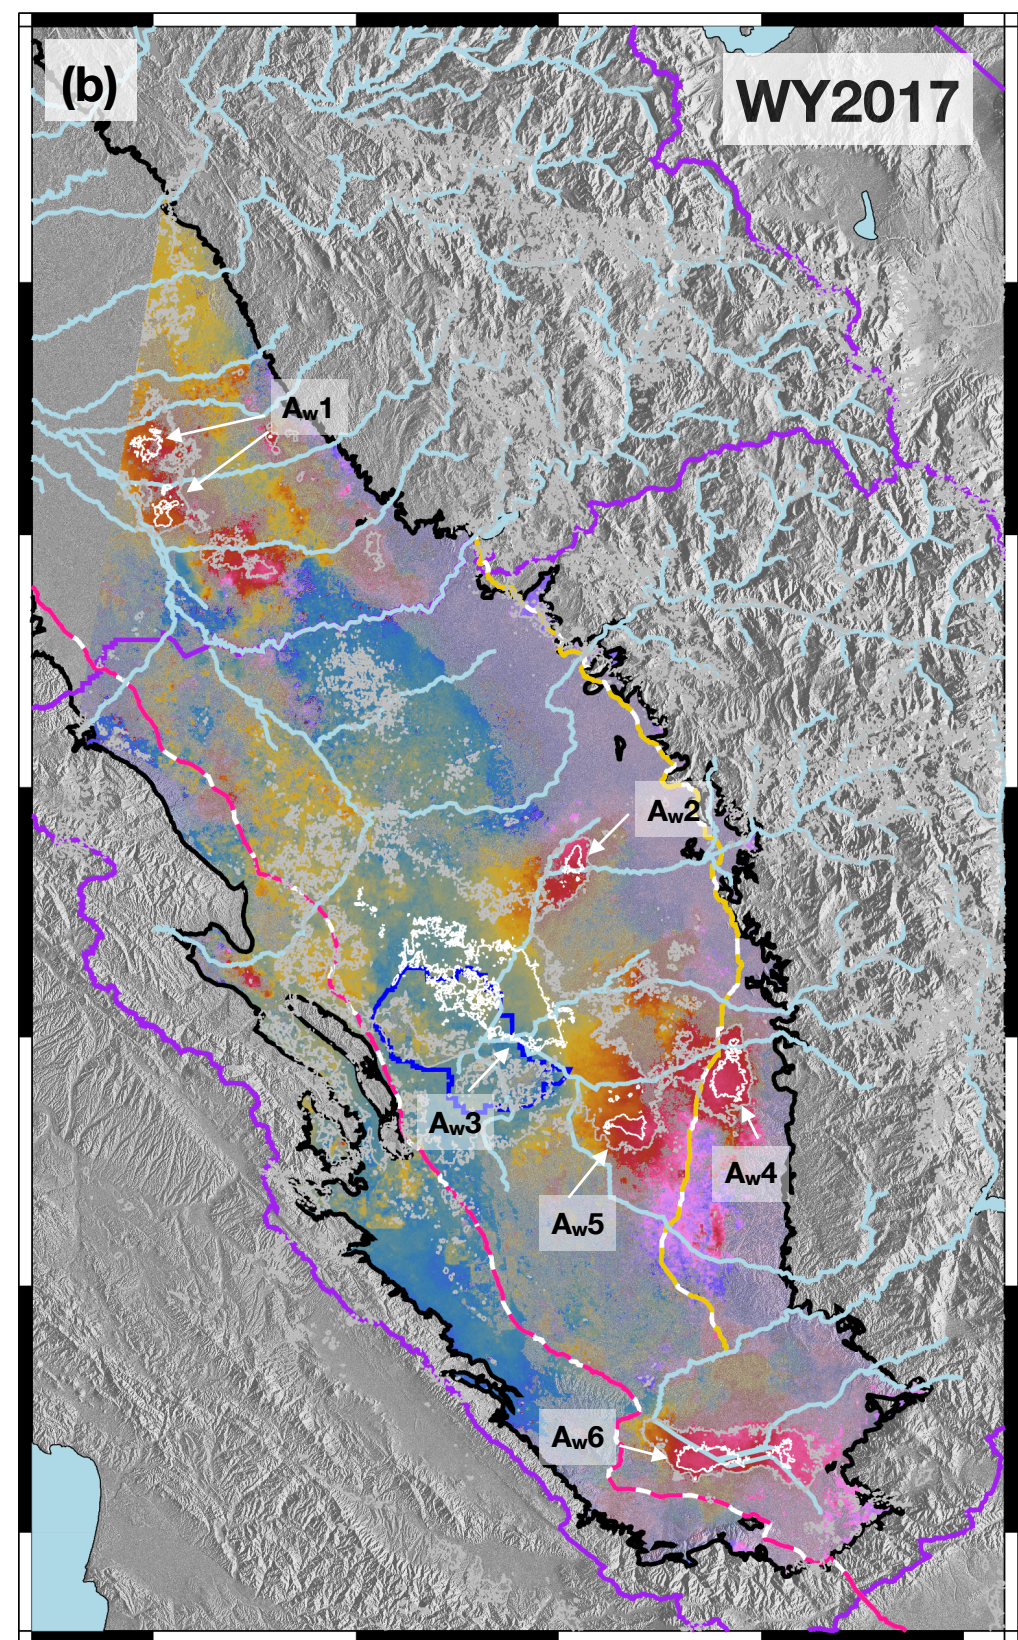

Supplement: WRCR-57-e2020WR028451-s002.pdf [file WRCR-57-e2020WR028451-s002.pdf]

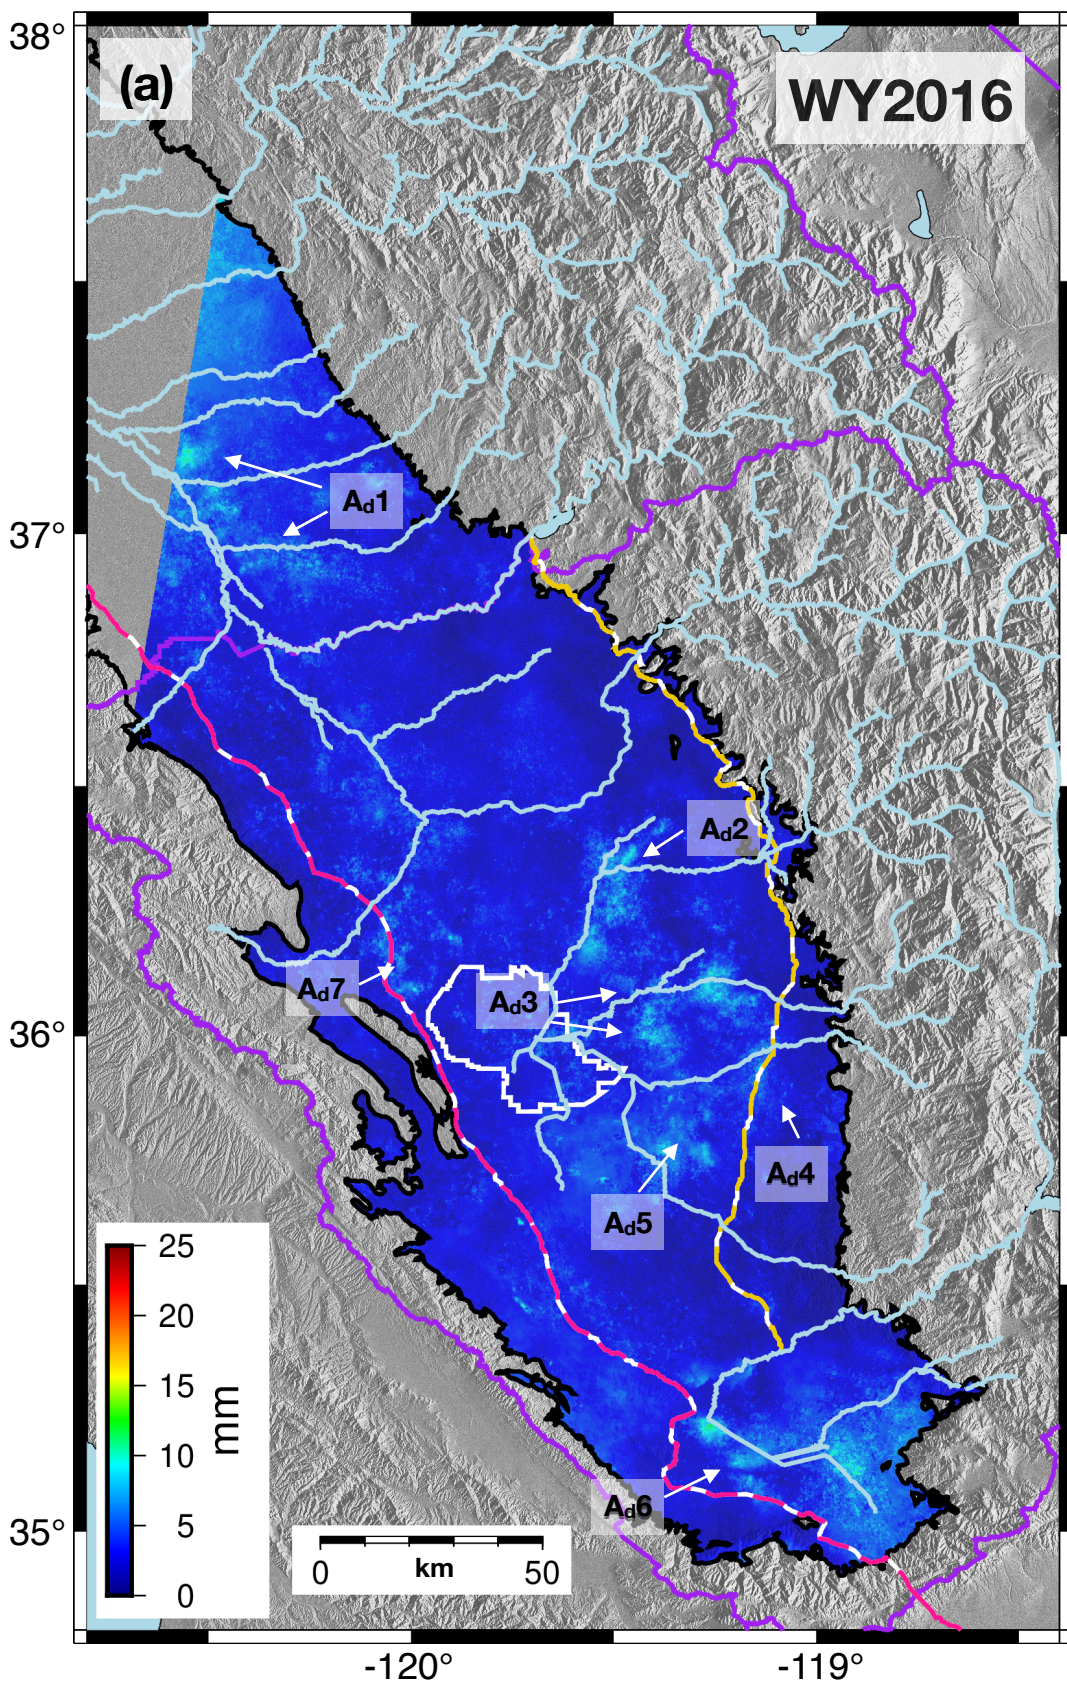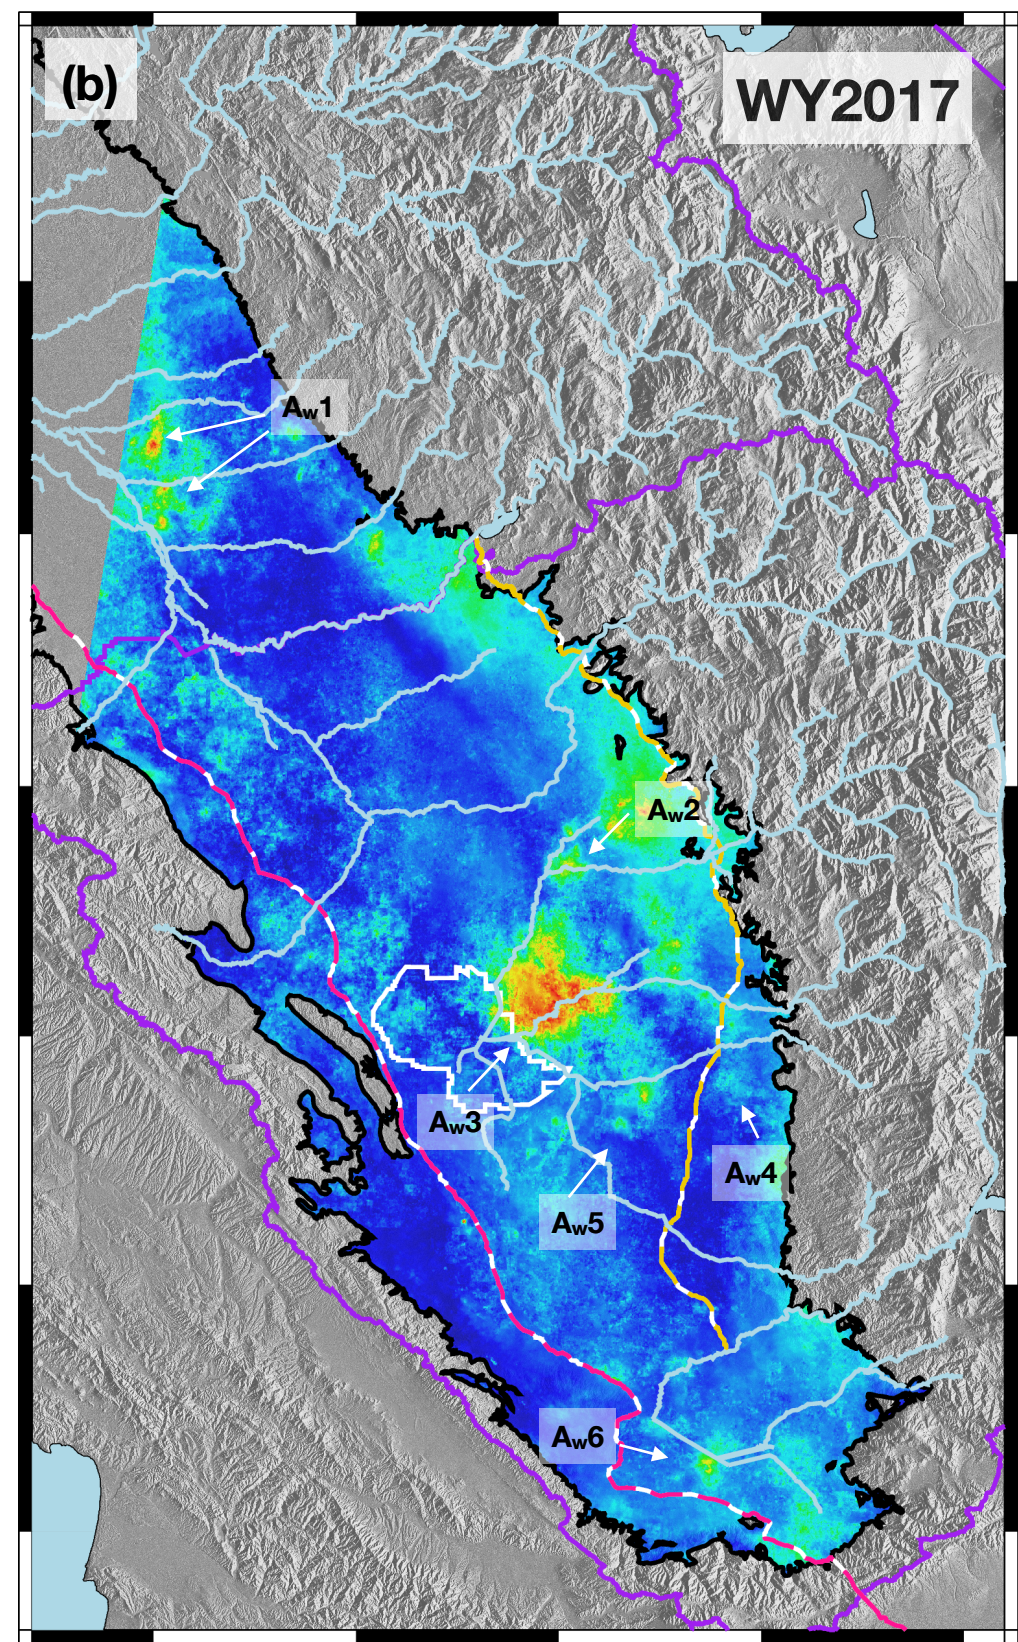

Supplement: WRCR-57-e2020WR028451-s004.pdf [file WRCR-57-e2020WR028451-s004.pdf]

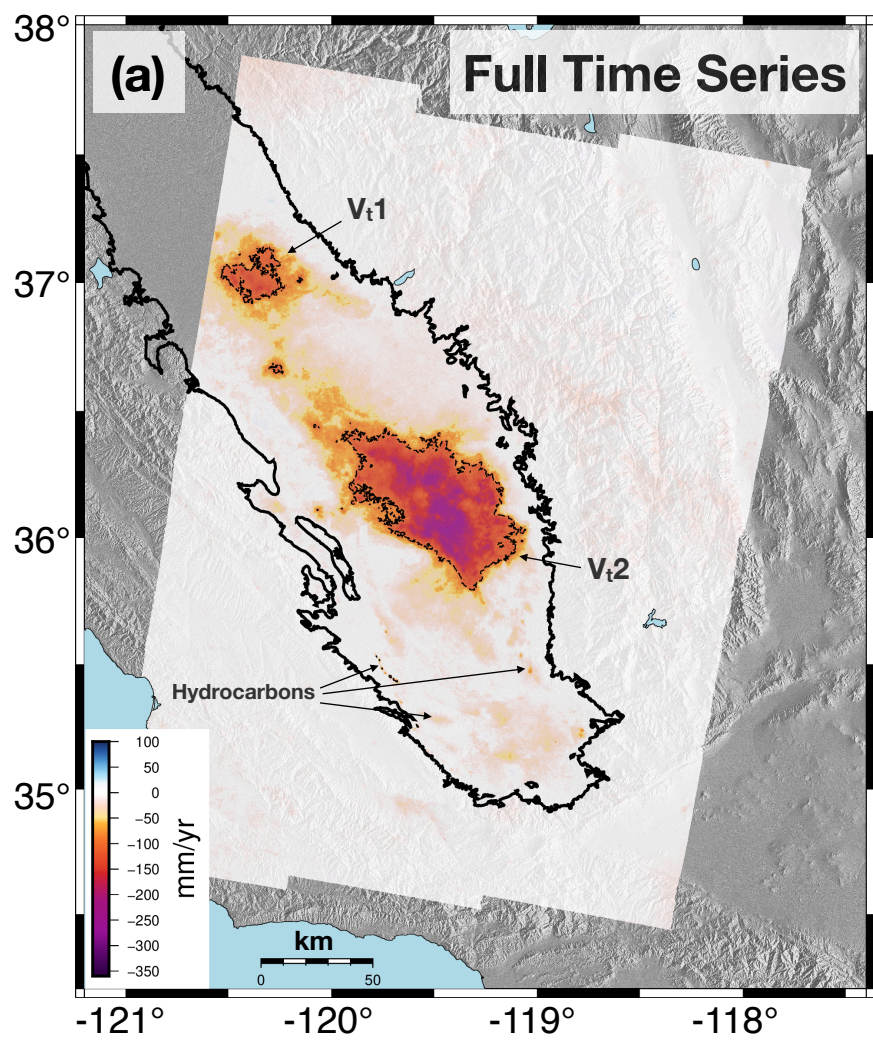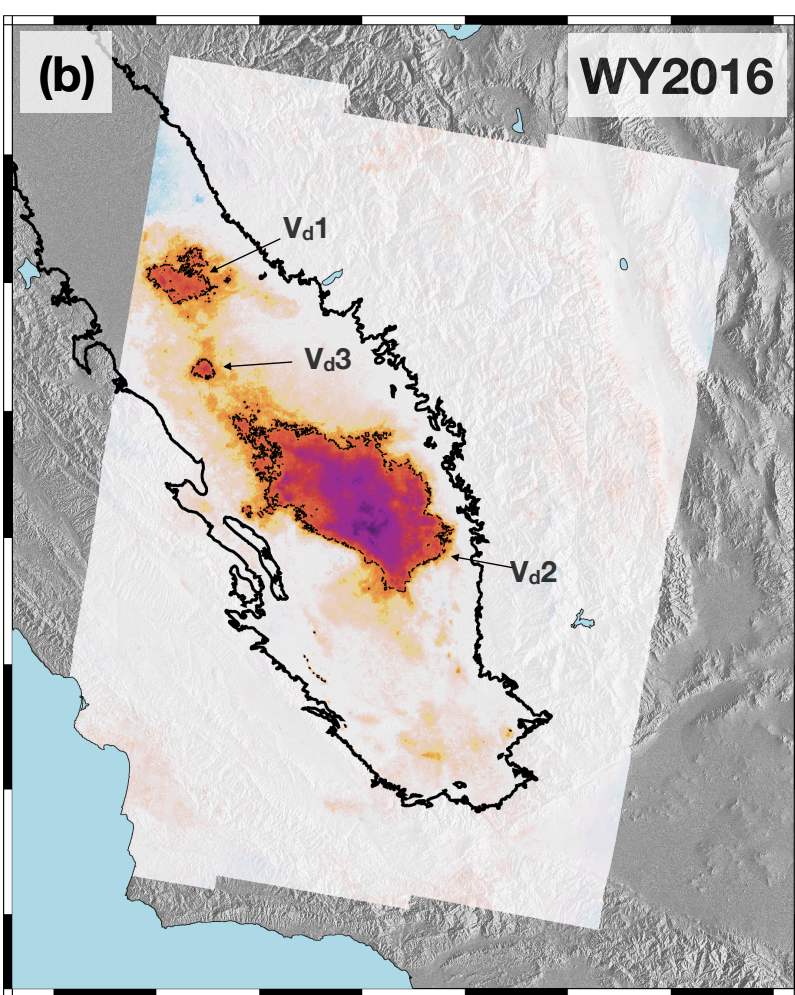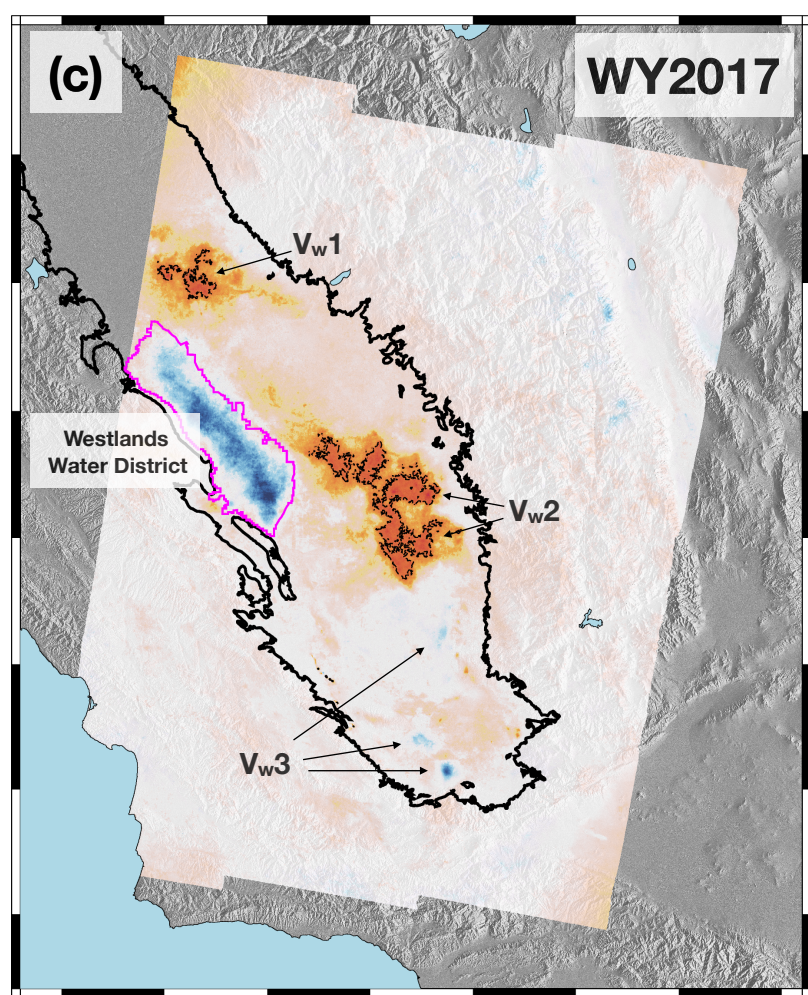

Supplement: WRCR-57-e2020WR028451-s005.pdf [file WRCR-57-e2020WR028451-s005.pdf]

# Comparison of Phase Progression

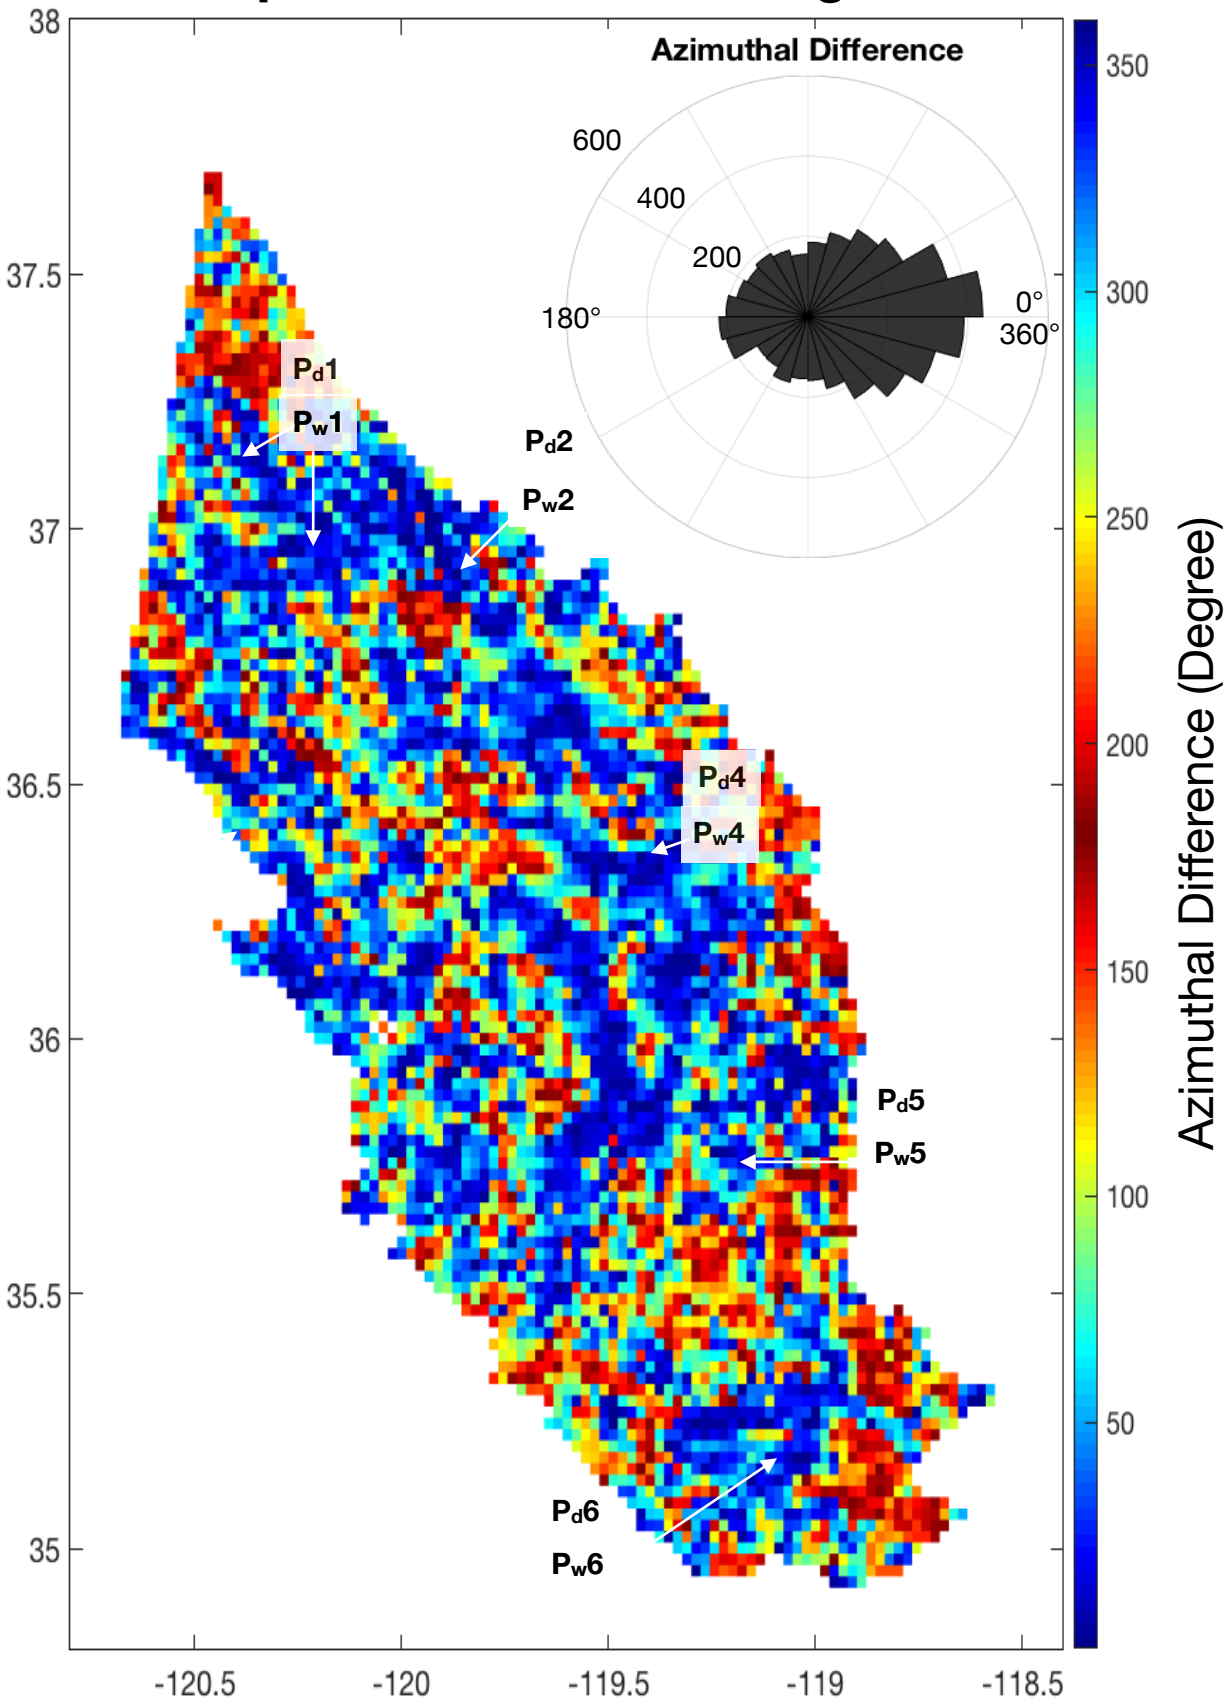

Supplement: WRCR-57-e2020WR028451-s006.pdf [file WRCR-57-e2020WR028451-s006.pdf]

# Original Interferogram

# Residual Model

# Corrected Interferogram

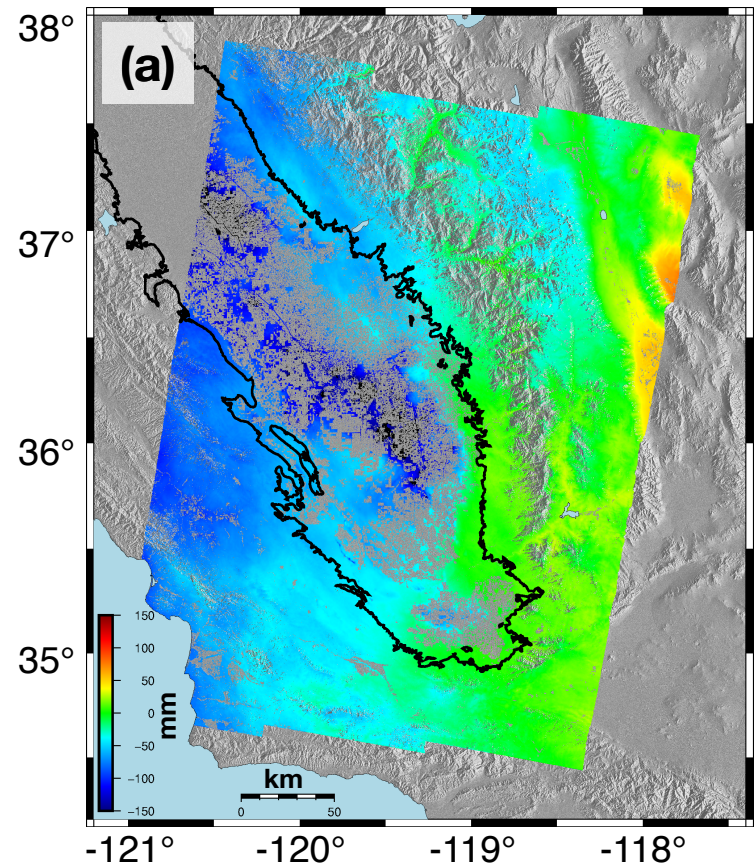

+

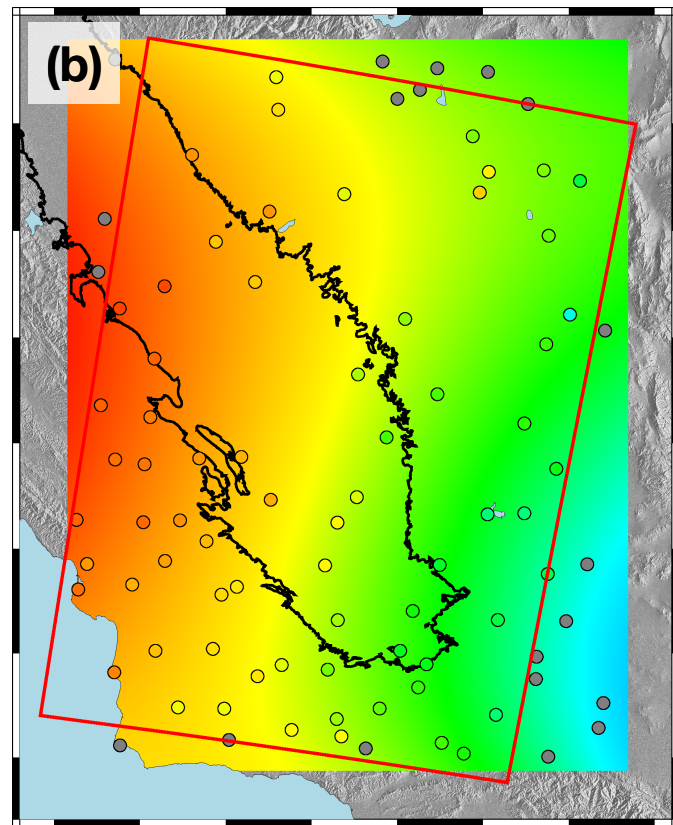

=

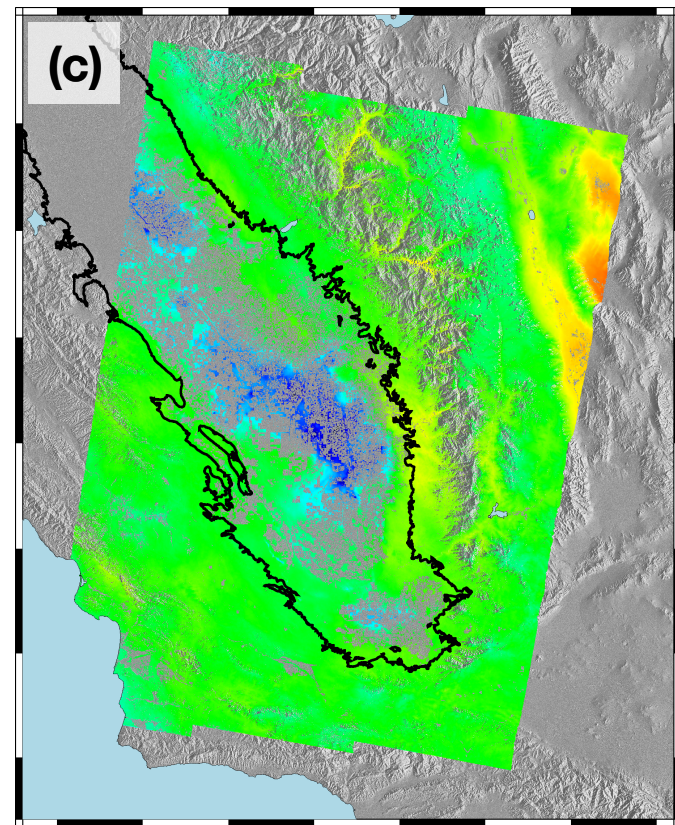

Supplement: WRCR-57-e2020WR028451-s009.pdf [file WRCR-57-e2020WR028451-s009.pdf]

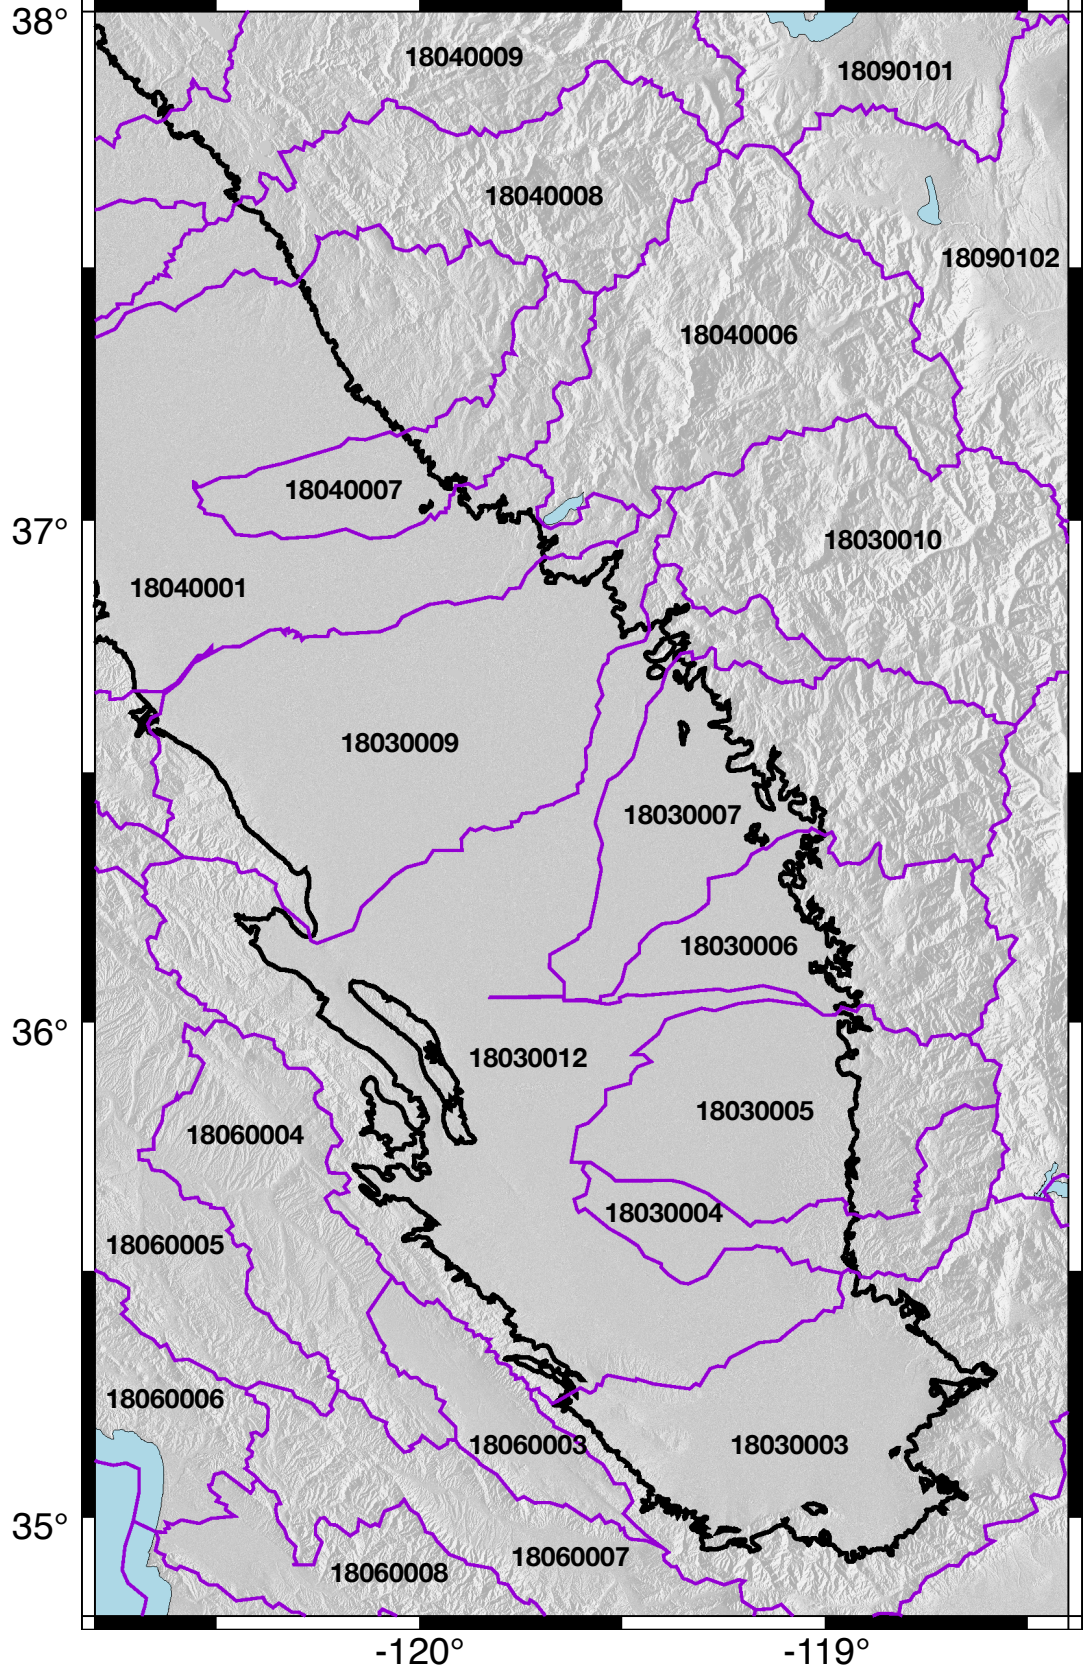

Supplement: WRCR-57-e2020WR028451-s011.pdf [file WRCR-57-e2020WR028451-s011.pdf]

# Effect of Subsidence on DEM Gradients

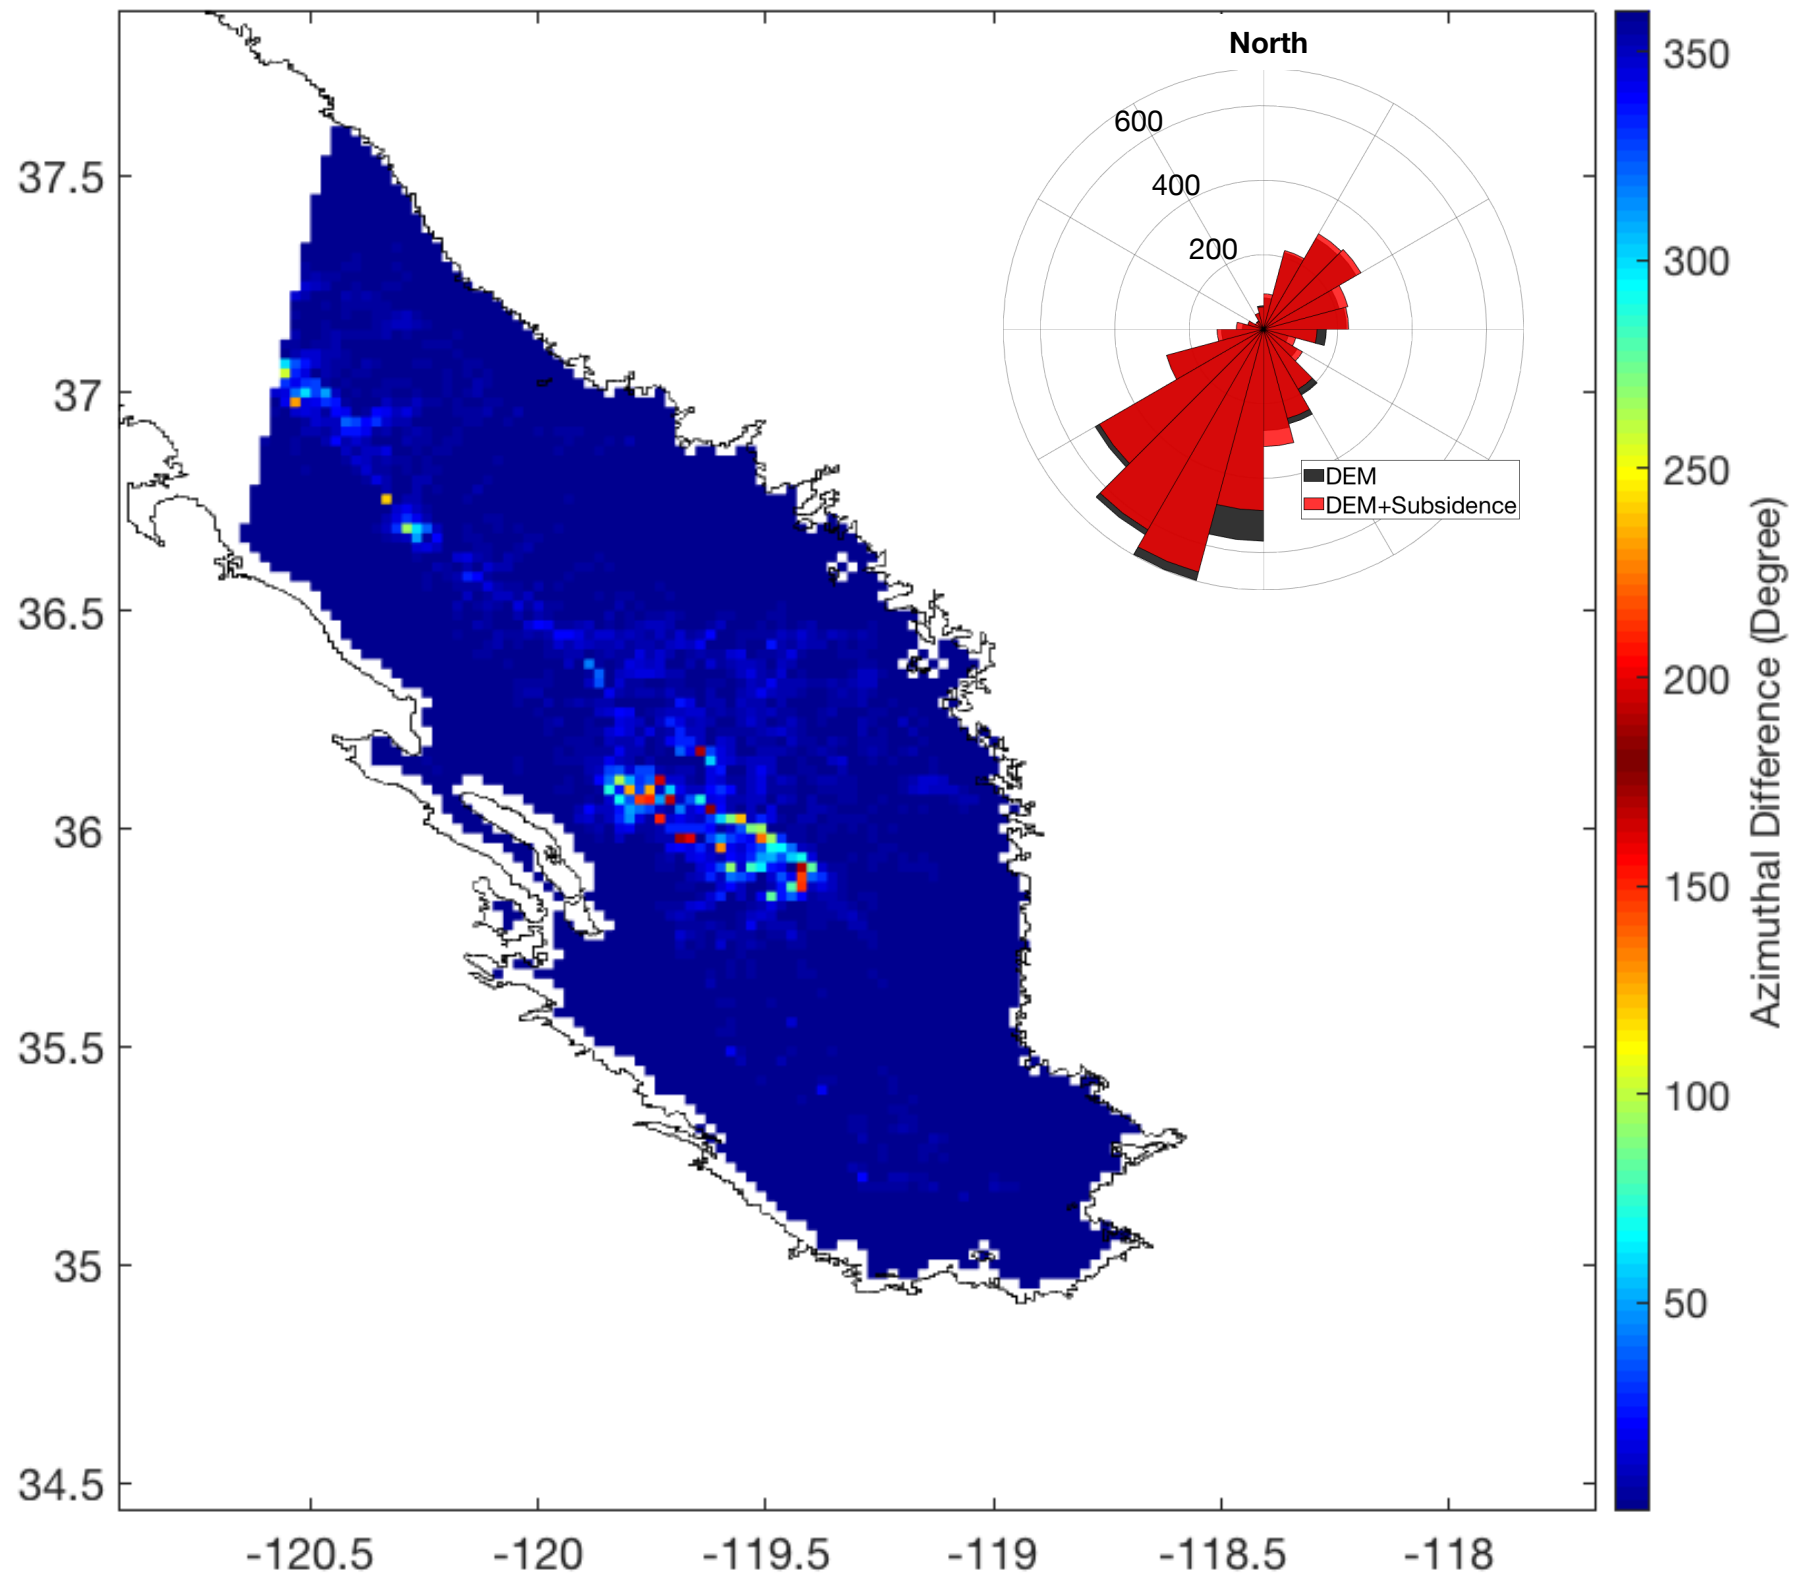

Supplement: WRCR-57-e2020WR028451-s012.pdf [file WRCR-57-e2020WR028451-s012.pdf]

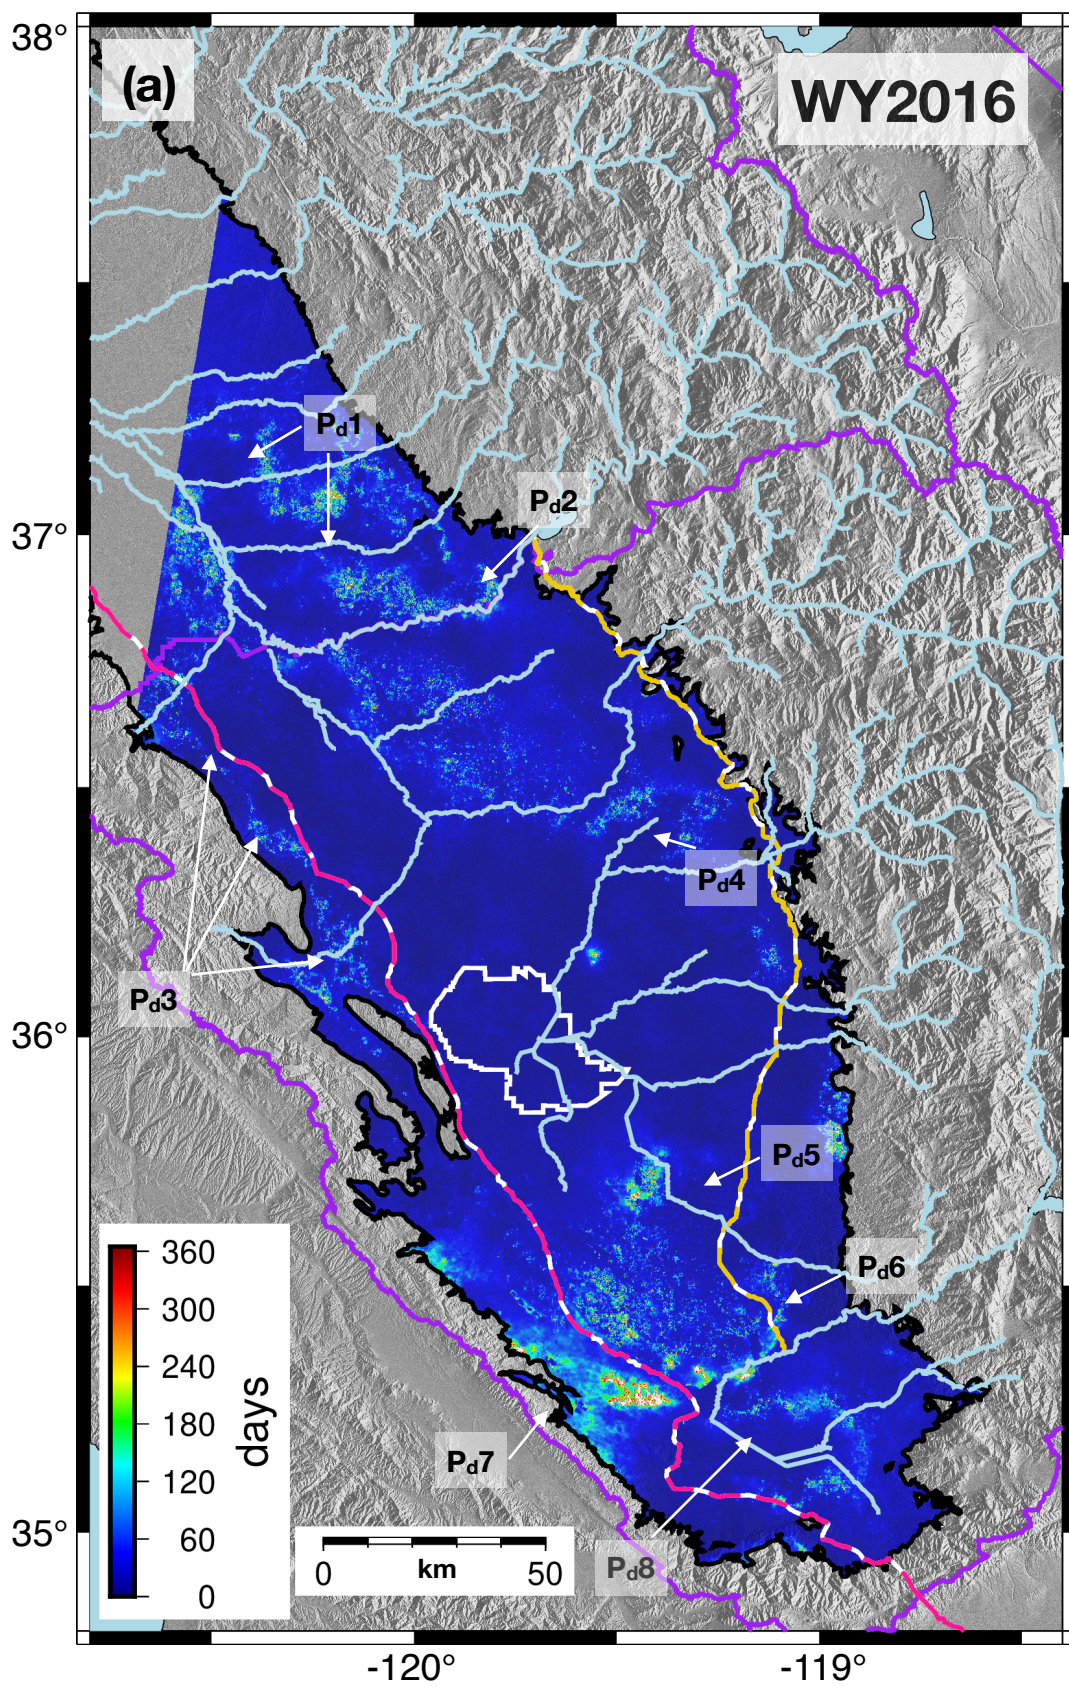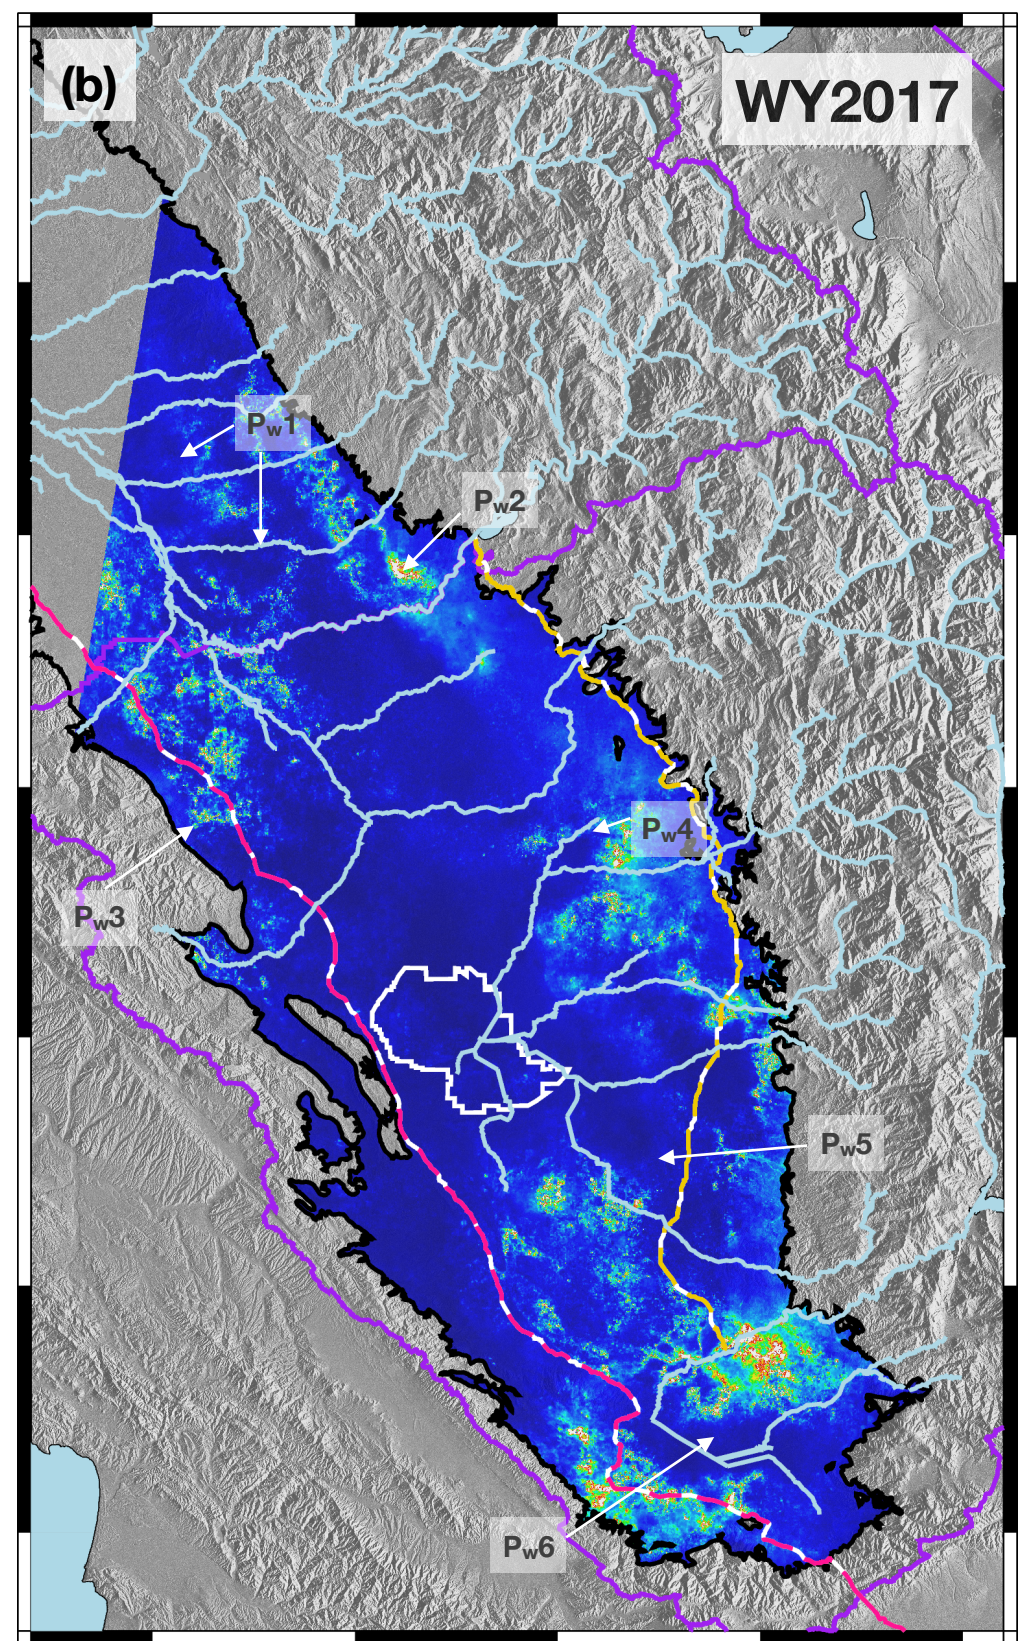

Supplement: WRCR-57-e2020WR028451-s013.pdf [file WRCR-57-e2020WR028451-s013.pdf]

# Baselines and Interferograms

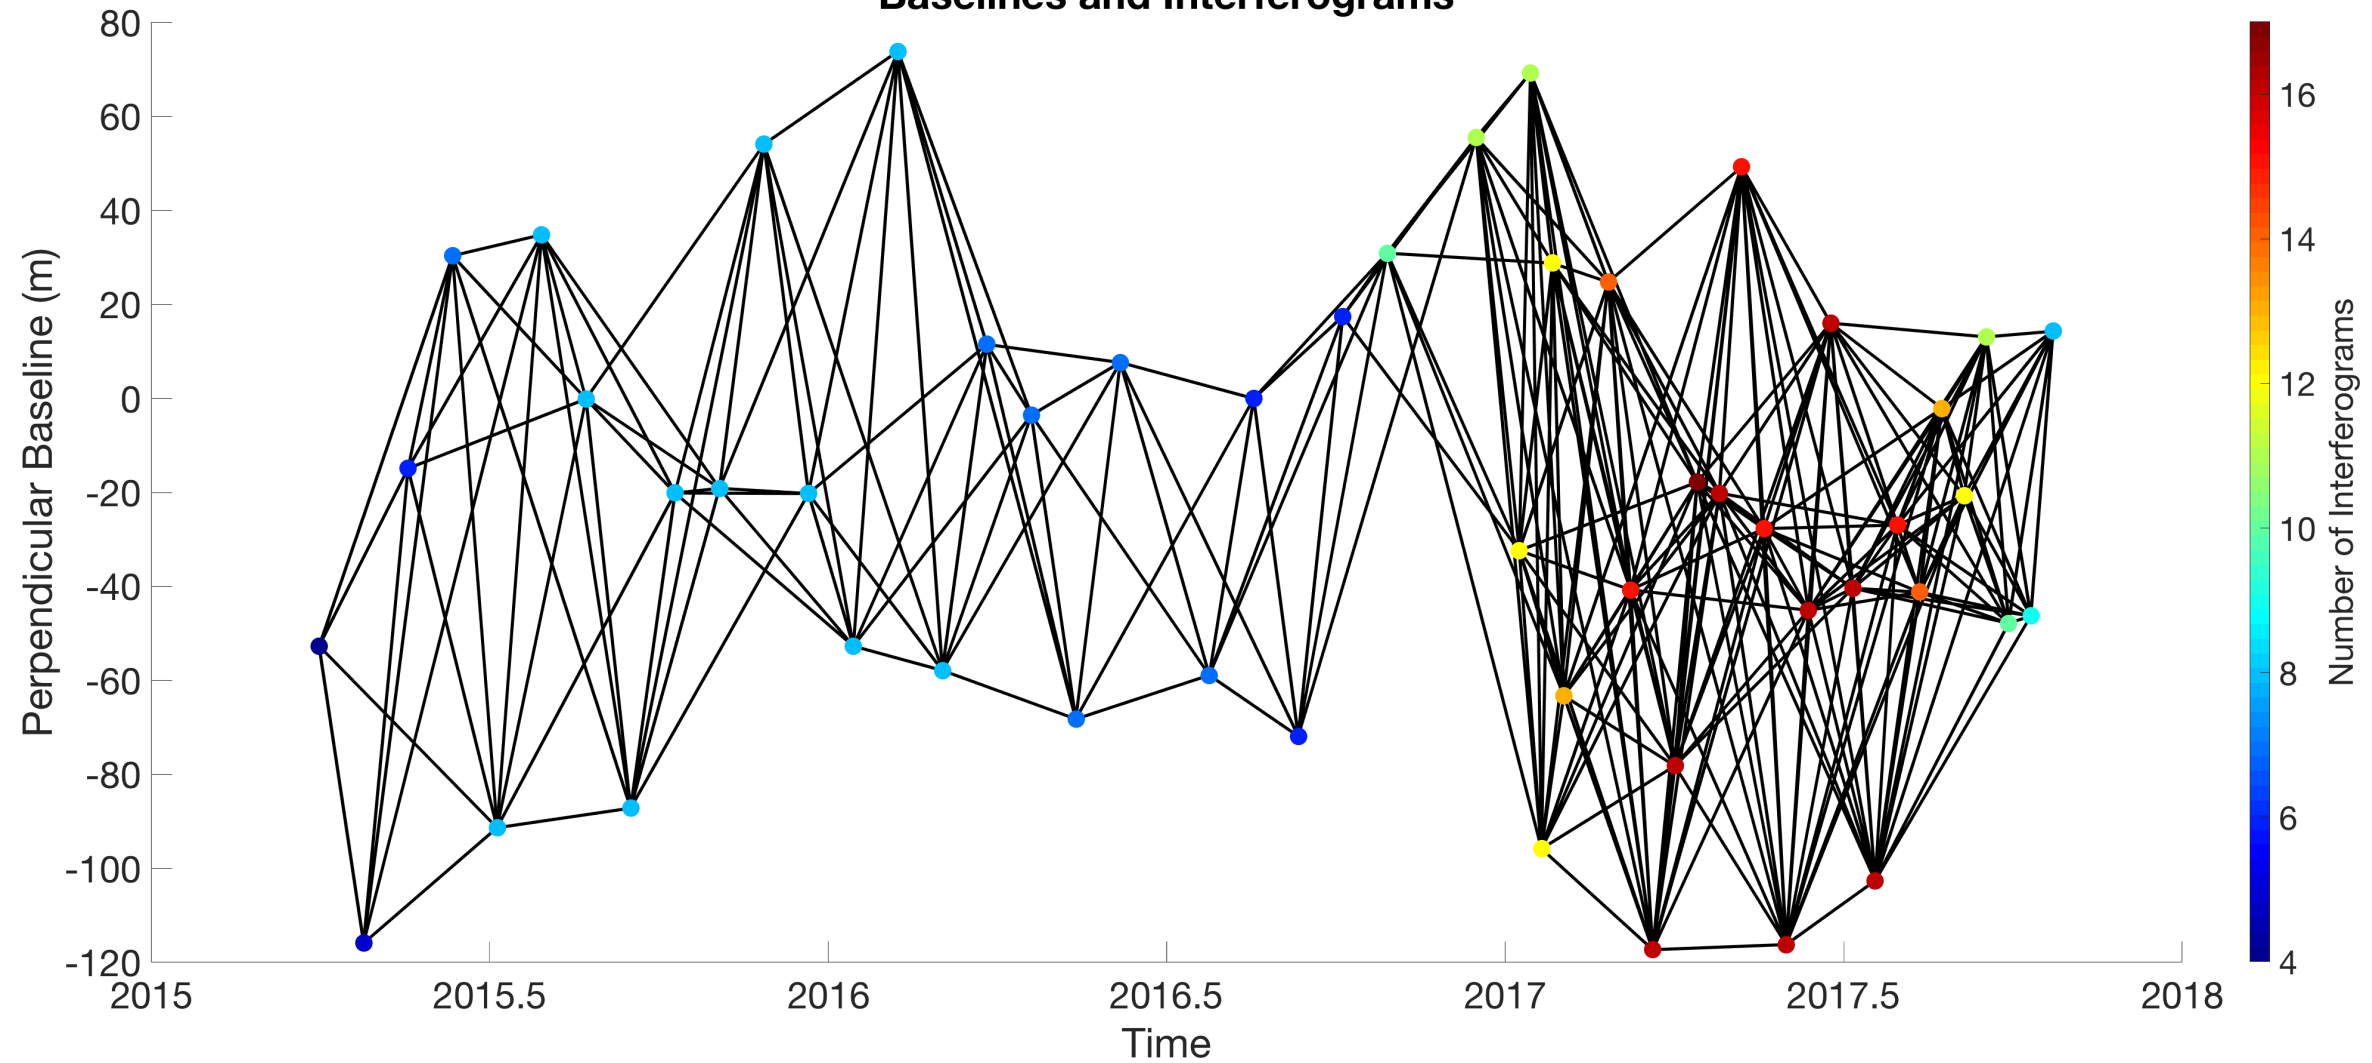

Supplement: WRCR-57-e2020WR028451-s014.pdf [file WRCR-57-e2020WR028451-s014.pdf]

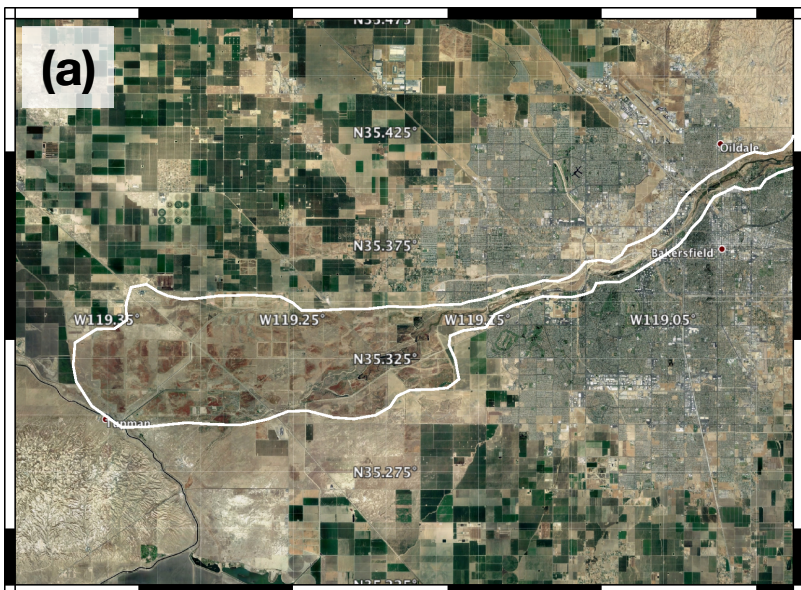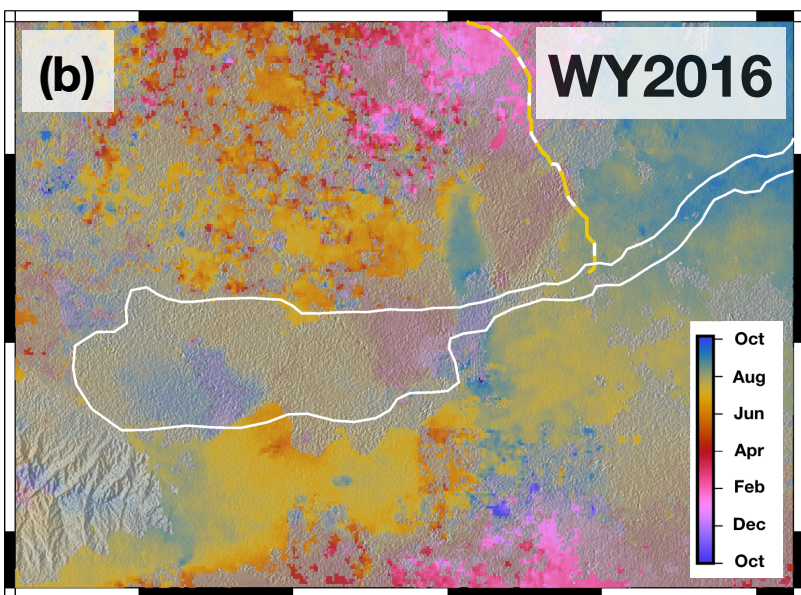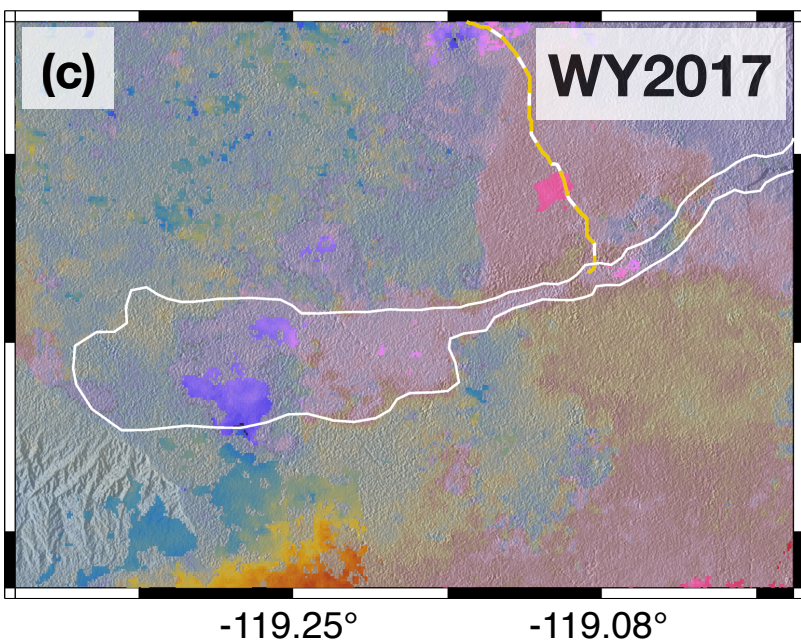

Supplement: WRCR-57-e2020WR028451-s015.pdf [file WRCR-57-e2020WR028451-s015.pdf]
